# Supplementary material for: Analysis of potential barriers for non-PrEP users among MSM in Germany
Source: Research Square preprint supplement (doi:10.21203/rs.3.rs-8163580/v1), 2025-12-01
Supplement: Supplementary file 1 [file 885f69eac09a5b38f680e7d8.pdf]

# **Appendix: Analysis of potential barriers for non-PrEP users among MSM in Germany**

## **Overview**

Appendix S1: Excerpt of survey questions from PrApp survey

Appendix S2: Grouping of variables

Appendix S3: Comparison of PrEP and non-PrEP users with a PrEP indication

Appendix S4: Sensitivity analysis of multivariable logistic regression model including missing values as a separate category

## Appendix S1: Excerpt of survey questions from PrApp survey

| Question                                                                                                                                                                                                                                                         | Answer options                                                                                                                                                                                                                                                                                                                                                                                                      |
|------------------------------------------------------------------------------------------------------------------------------------------------------------------------------------------------------------------------------------------------------------------|---------------------------------------------------------------------------------------------------------------------------------------------------------------------------------------------------------------------------------------------------------------------------------------------------------------------------------------------------------------------------------------------------------------------|
| <b>PrEP usage</b>                                                                                                                                                                                                                                                |                                                                                                                                                                                                                                                                                                                                                                                                                     |
| Are you currently taking or have you ever taken preexposure prophylaxis (PrEP) against HIV?                                                                                                                                                                      | <ul style="list-style-type: none"> <li>• Yes, I am taking PrEP on a daily basis.</li> <li>• Yes, I take it intermittently when I think I need it</li> <li>• Yes, I used to take PrEP, but I permanently stopped</li> <li>• No</li> </ul>                                                                                                                                                                            |
| <b>General information</b>                                                                                                                                                                                                                                       |                                                                                                                                                                                                                                                                                                                                                                                                                     |
| Have you participated in this survey before?<br>(e.g. July – October 2018, April/May 2019<br>or March-May 2020 (only in last survey wave))                                                                                                                       | <ul style="list-style-type: none"> <li>• Yes</li> <li>• No</li> <li>• I don't remember</li> </ul>                                                                                                                                                                                                                                                                                                                   |
| How old are you?                                                                                                                                                                                                                                                 |                                                                                                                                                                                                                                                                                                                                                                                                                     |
| What gender do you identify with?                                                                                                                                                                                                                                | <ul style="list-style-type: none"> <li>• Male</li> <li>• Female</li> <li>• Inter</li> <li>• Trans male</li> <li>• Trans female</li> <li>• Non-binary</li> </ul>                                                                                                                                                                                                                                                     |
| What gender were you assigned at birth?                                                                                                                                                                                                                          | <ul style="list-style-type: none"> <li>• Male</li> <li>• Female</li> <li>• Intersexual</li> </ul>                                                                                                                                                                                                                                                                                                                   |
| In which country were you born?                                                                                                                                                                                                                                  | List of countries with translations                                                                                                                                                                                                                                                                                                                                                                                 |
| What are the first three digits of the postal code of your residence in Germany?<br>If you are not living in Germany, please indicate the first three digits<br>of the postal code of the place where you are predominantly staying (e.g. hotel).                |                                                                                                                                                                                                                                                                                                                                                                                                                     |
| What is the overall net income of the household you live in?                                                                                                                                                                                                     | <ul style="list-style-type: none"> <li>• 1 to less than 1000 €</li> <li>• 1000 to less than 2000 €</li> <li>• 2000 to less than 3000 €</li> <li>• 3000 to less than 4000 €</li> <li>• 4000 to less than 5000 €</li> <li>• 5000 € and more</li> </ul>                                                                                                                                                                |
| With income we mean:<br>salaries/wages, non-wage incomes,<br>retirement pension, unemployment benefits,<br>housing benefits, family allowances, etc.<br>From this income, please subtract<br>all taxes, operating expenses, and<br>social security contributions |                                                                                                                                                                                                                                                                                                                                                                                                                     |
| How many people are living in your household?                                                                                                                                                                                                                    | <ul style="list-style-type: none"> <li>• I am living alone</li> <li>• xxx persons</li> </ul>                                                                                                                                                                                                                                                                                                                        |
| Did you graduate from school?                                                                                                                                                                                                                                    | <ul style="list-style-type: none"> <li>• Yes</li> <li>• No</li> <li>• Prefer not to say</li> </ul>                                                                                                                                                                                                                                                                                                                  |
| What school leaving qualification do you have?                                                                                                                                                                                                                   | <ul style="list-style-type: none"> <li>• Secondary school qualification (“Hauptschulabschluss” / “Volksschulabschluss”), class 8 to 9</li> <li>• Secondary school qualification (“Realschulabschluss”) O-Levels (“Mittlere Reife”), class 10</li> <li>• Grammar school qualification (“Gymnasium” or “EOS”), A-Levels (“Abitur”), class 12 or 13, Technical college qualification (“Fachhochschulreife”)</li> </ul> |
| <b>Sexual behaviour and risk behaviour</b>                                                                                                                                                                                                                       |                                                                                                                                                                                                                                                                                                                                                                                                                     |
| Are you having sex with...<br>Select all that apply:                                                                                                                                                                                                             | <ul style="list-style-type: none"> <li>• Men</li> <li>• Women</li> <li>• Non-binary people</li> </ul>                                                                                                                                                                                                                                                                                                               |

| Question                                                                                                                                                                          | Answer options                                                                                                                                                                                                                                                       |
|-----------------------------------------------------------------------------------------------------------------------------------------------------------------------------------|----------------------------------------------------------------------------------------------------------------------------------------------------------------------------------------------------------------------------------------------------------------------|
| With how many different partners have you had anal and/or vaginal sex within the last 6 months?                                                                                   | <ul style="list-style-type: none"> <li>• 0</li> <li>• 1</li> <li>• 2-3</li> <li>• 4-5</li> <li>• 6-10</li> <li>• 11-20</li> <li>• more than 20</li> <li>• I don't know</li> </ul>                                                                                    |
| How often have you had anal and/or vaginal sex in the last month?                                                                                                                 | <ul style="list-style-type: none"> <li>• Not at all</li> <li>• 1-4 times</li> <li>• 5-8 times</li> <li>• 9-12 times</li> <li>• More than 12 times</li> <li>• I don't know</li> </ul>                                                                                 |
| Have you taken any substances in the last 6 months to have more intense or longer sex? e.g. GHB/GBL, crystal meth, ketamine, cocaine, speed, bath salts, mephedrone, ecstasy/MDMA | <ul style="list-style-type: none"> <li>• Yes</li> <li>• No</li> <li>• Prefer not to say</li> </ul>                                                                                                                                                                   |
| Did you inject these substances?                                                                                                                                                  | <ul style="list-style-type: none"> <li>• Yes, but not within the last 6 months</li> <li>• Yes, 1-3 times within the last 6 months</li> <li>• Yes, more often than 3 times within the last 6 months</li> <li>• No</li> <li>• Prefer not to say</li> </ul>             |
| Were you paid for sex within the last 6 months? By payment we mean the exchange of money, gifts, or favors for sex.                                                               | <ul style="list-style-type: none"> <li>• Yes</li> <li>• No</li> <li>• Prefer not to say</li> </ul>                                                                                                                                                                   |
| How often do you use condoms for anal / vaginal sex in periods when you are taking PrEP?                                                                                          | <ul style="list-style-type: none"> <li>• Always (in more than 95% of the times)</li> <li>• Often (about 75% of the times)</li> <li>• About half of the times (50%)</li> <li>• Sometimes (about 25% of the times)</li> <li>• Never</li> <li>• I don't know</li> </ul> |
| How happy are you with your sex life at the moment?                                                                                                                               | <ul style="list-style-type: none"> <li>• Very happy</li> <li>• Happy</li> <li>• I'm not sure</li> <li>• Unhappy</li> <li>• Very unhappy</li> <li>• Sex is not important for me at the moment</li> </ul>                                                              |
| <b>Sexually transmitted infections</b>                                                                                                                                            |                                                                                                                                                                                                                                                                      |
| Have you had symptoms of a sexually transmitted infection in the last 12 months, e.g. pain when urinating, discharge, itching/pain in the anal area?                              | <ul style="list-style-type: none"> <li>• Yes</li> <li>• No</li> <li>• Prefer not to say</li> </ul>                                                                                                                                                                   |
| For which of the following STIs have you tested positive? / Which STIs have you ever been diagnosed with? Select all that apply:                                                  | <ul style="list-style-type: none"> <li>• Syphilis</li> <li>• Gonorrhea</li> <li>• Chlamydia</li> <li>• Hepatitis C</li> <li>• None</li> <li>• I don't remember</li> </ul>                                                                                            |
| How often have you been diagnosed with syphilis in the last 12 months?                                                                                                            | <ul style="list-style-type: none"> <li>• 1-10</li> <li>• More than 10 times</li> </ul>                                                                                                                                                                               |
| How often have you been diagnosed with gonorrhea in the last 12 months?                                                                                                           | <ul style="list-style-type: none"> <li>• 1-10</li> <li>• More than 10 times</li> </ul>                                                                                                                                                                               |
| How often have you been diagnosed with chlamydia in the last 12 months?                                                                                                           | <ul style="list-style-type: none"> <li>• 1-10</li> <li>• More than 10 times</li> </ul>                                                                                                                                                                               |
| How often have you been diagnosed with hepatitis C in the last 12 months?                                                                                                         | <ul style="list-style-type: none"> <li>• 1-10</li> <li>• More than 10 times</li> </ul>                                                                                                                                                                               |
| <b>Reasons for non-PrEP use</b>                                                                                                                                                   |                                                                                                                                                                                                                                                                      |

| Question                                                                             | Answer options                                                                                                                                                                                                                                                                                                                                                                                                                                                                                                                                                                                |
|--------------------------------------------------------------------------------------|-----------------------------------------------------------------------------------------------------------------------------------------------------------------------------------------------------------------------------------------------------------------------------------------------------------------------------------------------------------------------------------------------------------------------------------------------------------------------------------------------------------------------------------------------------------------------------------------------|
| Why are you not using PrEP?<br>(multiple answers)                                    | <ul style="list-style-type: none"> <li>• My HIV risk is not high enough.</li> <li>• I am HIV-positive.</li> <li>• I cannot take PrEP due to medical reasons.</li> <li>• I can't find a doctor to prescribe PrEP to me.</li> <li>• I don't want to talk about my sexual life with my doctor.</li> <li>• The effort of regularly visiting a doctor for refills and medical tests is too high for me.</li> <li>• Taking a pill every day is too demanding for me.</li> <li>• I am afraid of negative reactions from others / sexual partners.</li> <li>• I am afraid of side effects.</li> </ul> |
| The survey waves were conducted 24.02.2020 - 19.05.2020 and 02.11.2020 - 07.01.2021. |                                                                                                                                                                                                                                                                                                                                                                                                                                                                                                                                                                                               |
|                                                                                      |                                                                                                                                                                                                                                                                                                                                                                                                                                                                                                                                                                                               |

## Appendix S2: Grouping of variables

| Variable                                              | Grouping                                                                                                                                                     |
|-------------------------------------------------------|--------------------------------------------------------------------------------------------------------------------------------------------------------------|
| age                                                   | 18–29<br>30–39 (R)<br>40–49<br>50–80                                                                                                                         |
| country of origin                                     | Germany / Outside Germany (R)                                                                                                                                |
| urban vs. rural area                                  | urban area (R) / rural area                                                                                                                                  |
| HIV-specialists density in federal state of residence | 0<br>1–2<br>3–5<br>6–9 (R)<br>10–13                                                                                                                          |
| school leaving certificate                            | no school leaving certificate<br>secondary school qualification (class 8 to 9)<br>secondary school qualification (class 10)<br>A-Levels (class 12 or 13) (R) |
| monthly net-equivalent income                         | <1000€<br>1000 – <2000€<br>2000 – <3000€ (R)<br>3000 – <4000€<br>4000 – <5000€<br>≥5000€                                                                     |
| satisfaction with sex life                            | content (R)<br>discontent<br>sex doesn't matter right now                                                                                                    |
| sex with men                                          | yes / no                                                                                                                                                     |
| sex with women                                        | yes / no                                                                                                                                                     |
| sex with non-binary people                            | yes / no                                                                                                                                                     |
| sex partners in the last 6 months                     | 0<br>1<br>2–3<br>4–5<br>6–10<br>11–20<br>>20 (R)                                                                                                             |
| sex frequency last month                              | 0x<br>1–4x (R)<br>5–8x<br>9–12x<br>>12x                                                                                                                      |
| sexualized substance use in the last 6 months         | yes / no                                                                                                                                                     |
| injective sexualized substance use                    | yes, but not in the last 6 months<br>yes, 1–3x in the last 6 months<br>yes, more than 3x in the last 6 months<br>no (R)                                      |
| payment for sex in the last 6 months                  | yes / no                                                                                                                                                     |
| condom use                                            | 0%<br>25% (R)<br>50%<br>75%<br>>95%                                                                                                                          |
| STI symptoms in the last 12 months                    | yes / no                                                                                                                                                     |
| syphilis diagnosis in the past                        | yes / no                                                                                                                                                     |
| gonorrhea diagnosis in the past                       | yes / no                                                                                                                                                     |
| chlamydia diagnosis in the past                       | yes / no                                                                                                                                                     |
| hepatitis C diagnosis in the past                     | yes / no                                                                                                                                                     |
| no STI diagnoses in the past                          | yes / no                                                                                                                                                     |
| syphilis diagnoses in the last 12 months              | 0 / 1 (R) / ≥2                                                                                                                                               |
| gonorrhea diagnoses in the last 12 months             | 0 / 1 (R) / ≥2                                                                                                                                               |
| chlamydia diagnoses in the last 12 months             | 0 / 1 (R) / ≥2                                                                                                                                               |
| hepatitis C diagnoses in the last 12 months           | 0 / 1                                                                                                                                                        |

(R) indicates the reference category

### Appendix S3: Comparison of PrEP and non-PrEP users with a PrEP indication

|                                                                        | PrEP<br>users,<br>n (%) | Non-PrEP<br>users,<br>n (%) | $\beta$ (95% CI) <sup>a</sup> | P-value <sup>b</sup> |
|------------------------------------------------------------------------|-------------------------|-----------------------------|-------------------------------|----------------------|
| <b>Total (n)</b>                                                       | 1027                    | 431                         |                               |                      |
| <b>Age (years)</b>                                                     |                         |                             |                               |                      |
| Median (IQR)                                                           | 38 (31 - 45)            | 35 (28 - 43.5)              | -                             |                      |
| 18-29, n (%)                                                           | 201 (19.6%)             | 136 (31.6%)                 | -0.24 (-0.46 - -0.03)         | 0.013                |
| 30-39, n (%)                                                           | 358 (34.9%)             | 132 (30.6%)                 | 0                             |                      |
| 40-49, n (%)                                                           | 306 (29.8%)             | 97 (22.5%)                  | 0.07 (0.00 - 0.27)            | 0.308                |
| 50-80, n (%)                                                           | 162 (15.8%)             | 66 (15.3%)                  | -0.01 (-0.23 - 0.00)          | 0.502                |
| Missing, n (%)                                                         | 0 (0%)                  | 0 (0%)                      | -                             |                      |
| <b>Country of origin, n (%)</b>                                        |                         |                             |                               |                      |
| Germany                                                                | 847 (82.5%)             | 337 (78.2%)                 | 0.00 (0.00 - 0.18)            | 0.617                |
| Outside Germany                                                        | 180 (17.5%)             | 94 (21.8%)                  |                               |                      |
| Missing                                                                | 0 (0%)                  | 0 (0%)                      | -                             |                      |
| <b>Urban-rural area (based on plz), n (%)</b>                          |                         |                             |                               |                      |
| Urban area                                                             | 900 (87.6%)             | 352 (81.7%)                 | 0                             |                      |
| Rural area                                                             | 105 (10.2%)             | 61 (14.2%)                  | 0.00 (-0.21 - 0.00)           | 0.575                |
| Missing                                                                | 22 (2.1%)               | 18 (4.2%)                   | -                             |                      |
| <b>Density of HIV-specialists in federal state of residence, n (%)</b> |                         |                             |                               |                      |
| 0                                                                      | 12 (1.2%)               | 4 (0.9%)                    | 0.00 (0.00 - 0.00)            | 1.000                |
| 1-2                                                                    | 81 (7.9%)               | 42 (9.7%)                   | 0.00 (0.00 - 0.00)            | 0.976                |
| 3-5                                                                    | 255 (24.8%)             | 105 (24.4%)                 | 0.00 (0.00 - 0.21)            | 0.518                |
| 6-9                                                                    | 369 (35.9%)             | 181 (42.0%)                 | 0                             |                      |
| 10-13                                                                  | 288 (28.0%)             | 81 (18.8%)                  | 0.29 (0.09 - 0.51)            | 0.004                |
| Missing                                                                | 22 (2.1%)               | 18 (4.2%)                   | -                             |                      |
| <b>Type of school qualification, n (%)</b>                             |                         |                             |                               |                      |
| No school leaving qualification                                        | 7 (0.7%)                | 9 (2.1%)                    | 0.00 (0.00 - 0.00)            | 0.985                |
| class 8/9                                                              | 49 (4.8%)               | 20 (4.6%)                   | 0.00 (0.00 - 0.00)            | 0.994                |
| class 10                                                               | 190 (18.5%)             | 104 (24.1%)                 | -0.11 (-0.33 - 0.00)          | 0.159                |
| A-Levels (class 12 or 13)                                              | 776 (75.6%)             | 288 (66.8%)                 | 0                             |                      |
| Missing                                                                | 5 (0.5%)                | 10 (2.3%)                   | -                             |                      |
| <b>Monthly net equivalent income, n (%)</b>                            |                         |                             |                               |                      |
| <1000€                                                                 | 79 (7.7%)               | 74 (17.2%)                  | -0.30 (-0.52 - -0.03)         | 0.014                |
| 1000 - <2000€                                                          | 234 (22.8%)             | 126 (29.2%)                 | -0.09 (-0.28 - 0.00)          | 0.225                |
| 2000 - <3000€                                                          | 294 (28.6%)             | 120 (27.8%)                 | 0                             |                      |
| 3000 - <4000€                                                          | 189 (18.4%)             | 49 (11.4%)                  | 0.15 (0.00 - 0.39)            | 0.103                |
| 4000 - <5000€                                                          | 143 (13.9%)             | 33 (7.7%)                   | 0.09 (0.00 - 0.33)            | 0.232                |
| ≥5000€                                                                 | 44 (4.3%)               | 10 (2.3%)                   | 0.00 (0.00 - 0.09)            | 0.885                |
| Missing                                                                | 44 (4.3%)               | 19 (4.4%)                   | -                             |                      |
| <b>Sex life, n (%)</b>                                                 |                         |                             |                               |                      |
| Content                                                                | 717 (69.8%)             | 206 (47.8%)                 | 0                             |                      |
| Discontent                                                             | 148 (14.4%)             | 108 (25.1%)                 | -0.25 (-0.47 - -0.02)         | 0.018                |
| Sex doesn't matter right now                                           | 12 (1.2%)               | 14 (3.2%)                   | 0.00 (0.00 - 0.00)            | 0.993                |
| Missing                                                                | 150 (14.6%)             | 103 (23.9%)                 | -                             |                      |
| <b>Number of sex partners within the last 6 months, n (%)</b>          |                         |                             |                               |                      |
| 0                                                                      | 2 (0.2%)                | 8 (1.9%)                    | 0.00 (0.00 - 0.00)            | 0.996                |
| 1                                                                      | 3 (0.3%)                | 21 (4.9%)                   | -0.27 (-0.52 - 0.00)          | 0.042                |
| 2-3                                                                    | 123 (12.0%)             | 134 (31.1%)                 | -0.78 (-0.99 - -0.55)         | 0.000                |
| 4-5                                                                    | 164 (16.0%)             | 101 (23.4%)                 | -0.32 (-0.53 - -0.08)         | 0.004                |
| 6-10                                                                   | 242 (23.6%)             | 83 (19.3%)                  | 0.00 (0.00 - 0.11)            | 0.831                |
| 11-20                                                                  | 193 (18.8%)             | 35 (8.1%)                   | 0.27 (0.04 - 0.50)            | 0.011                |
| >20                                                                    | 286 (27.8%)             | 47 (10.9%)                  | 0                             |                      |
| Missing                                                                | 14 (1.4%)               | 2 (0.5%)                    | -                             |                      |
| <b>Condom use, n (%)</b>                                               |                         |                             |                               |                      |
| 0%                                                                     | 322 (31.4%)             | 62 (14.4%)                  | 0.50 (0.29 - 0.71)            | 0.000                |
| 25%                                                                    | 339 (33.0%)             | 113 (26.2%)                 | 0                             |                      |
| 50%                                                                    | 154 (15.0%)             | 101 (23.4%)                 | -0.29 (-0.51 - -0.07)         | 0.006                |
| 75%                                                                    | 106 (10.3%)             | 55 (12.8%)                  | 0.00 (-0.19 - 0.00)           | 0.695                |
| >95%                                                                   | 86 (8.4%)               | 97 (22.5%)                  | -0.59 (-0.83 - -0.35)         | 0.000                |
| Missing                                                                | 20 (1.9%)               | 3 (0.7%)                    | -                             |                      |
| <b>Number of sexual intercours in the last month, n (%)</b>            |                         |                             |                               |                      |
| 0                                                                      | 69 (6.7%)               | 63 (14.6%)                  | -0.08 (-0.32 - 0.00)          | 0.293                |
| 1-4                                                                    | 442 (43.0%)             | 217 (50.3%)                 | 0                             |                      |
| 5-8                                                                    | 232 (22.6%)             | 68 (15.8%)                  | 0.03 (0.00 - 0.25)            | 0.427                |
| 9-12                                                                   | 104 (10.1%)             | 40 (9.3%)                   | 0.00 (-0.09 - 0.00)           | 0.892                |

|                                                                       | PrEP<br>users,<br>n (%) | Non-PrEP<br>users,<br>n (%) | $\beta$ (95% CI) <sup>a</sup> | P-value <sup>b</sup> |
|-----------------------------------------------------------------------|-------------------------|-----------------------------|-------------------------------|----------------------|
| >12                                                                   | 168 (16.4%)             | 38 (8.8%)                   | 0.14 (0.00 - 0.38)            | 0.110                |
| Missing                                                               | 12 (1.2%)               | 5 (1.2%)                    | -                             |                      |
| <b>Drugs during sex in the last 6 months, n (%)</b>                   |                         |                             |                               |                      |
| Yes                                                                   | 201 (19.6%)             | 130 (30.2%)                 | -0.38 (-0.58 - -0.17)         | 0.000                |
| No                                                                    | 808 (78.7%)             | 289 (67.1%)                 |                               |                      |
| Missing                                                               | 18 (1.8%)               | 12 (2.8%)                   | -                             |                      |
| <b>Injecting drugs during sex, n (%)</b>                              |                         |                             |                               |                      |
| Yes, but 0x in the last 6 months                                      | 2 (0.2%)                | 5 (1.2%)                    | 0.00 (0.00 - 0.00)            | 1.000                |
| Yes, 1-3x in the last 6 months                                        | 10 (1.0%)               | 4 (0.9%)                    | 0.00 (0.00 - 0.00)            | 1.000                |
| Yes, >3x in the last 6 months                                         | 17 (1.7%)               | 6 (1.4%)                    | 0.00 (0.00 - 0.00)            | 1.000                |
| No                                                                    | 171 (16.7%)             | 114 (26.5%)                 | 0                             |                      |
| Missing                                                               | 827 (80.5%)             | 302 (70.1%)                 | -                             |                      |
| <b>Payment for sex in the last 6 months, n (%)</b>                    |                         |                             |                               |                      |
| Yes                                                                   | 58 (5.6%)               | 37 (8.6%)                   | 0.00 (-0.20 - 0.00)           | 0.653                |
| No                                                                    | 964 (93.9%)             | 381 (88.4%)                 |                               |                      |
| Missing                                                               | 5 (0.5%)                | 13 (3.0%)                   | -                             |                      |
| <b>Number of syphilis diagnosis in the last 12 months, n (%)</b>      |                         |                             |                               |                      |
| 0                                                                     | 166 (16.2%)             | 52 (12.1%)                  | 0                             |                      |
| 1                                                                     | 107 (10.4%)             | 42 (9.7%)                   | 0.00 (-0.06 - 0.00)           | 0.935                |
| ≥2                                                                    | 11 (1.1%)               | 2 (0.5%)                    | 0.00 (0.00 - 0.00)            | 1.000                |
| Missing                                                               | 743 (72.3%)             | 335 (77.7%)                 | -                             |                      |
| <b>Number of gonorrhoea diagnosis in the last 12 months, n (%)</b>    |                         |                             |                               |                      |
| 0                                                                     | 173 (16.8%)             | 65 (15.1%)                  | 0.00 (-0.18 - 0.00)           | 0.663                |
| 1                                                                     | 200 (19.5%)             | 56 (13.0%)                  | 0                             |                      |
| ≥2                                                                    | 68 (6.6%)               | 10 (2.3%)                   | 0.00 (0.00 - 0.13)            | 0.800                |
| Missing                                                               | 586 (57.1%)             | 300 (69.6%)                 | -                             |                      |
| <b>Number of chlamydia diagnosis in the last 12 months, n (%)</b>     |                         |                             |                               |                      |
| 0                                                                     | 132 (12.9%)             | 40 (9.3%)                   | 0.00 (-0.03 - 0.00)           | 0.956                |
| 1                                                                     | 221 (21.5%)             | 59 (13.7%)                  | 0                             |                      |
| ≥2                                                                    | 59 (5.7%)               | 2 (0.5%)                    | 0.10 (0.00 - 0.28)            | 0.180                |
| Missing                                                               | 615 (59.9%)             | 330 (76.6%)                 | -                             |                      |
| <b>Number of hepatitis C diagnosis in the last 12 months, n (%)</b>   |                         |                             |                               |                      |
| 0                                                                     | 20 (1.9%)               | 17 (3.9%)                   |                               |                      |
| 1                                                                     | 5 (0.5%)                | 1 (0.2%)                    | 0.00 (0.00 - 0.00)            | 1.000                |
| Missing                                                               | 1002 (97.6%)            | 413 (95.8%)                 | -                             |                      |
| <b>Gender of sexual partners, n (%) (multiple responses possible)</b> |                         |                             |                               |                      |
| Male                                                                  | 1027 (100.0%)           | 430 (99.8%)                 | 0.00 (0.00 - 0.00)            | 1.000                |
| Female                                                                | 44 (4.3%)               | 46 (10.7%)                  | -0.23 (-0.48 - 0.00)          | 0.056                |
| Non-binary                                                            | 33 (3.2%)               | 13 (3.0%)                   | 0.00 (0.00 - 0.00)            | 0.999                |
| Missing                                                               | 0 (0%)                  | 0 (0%)                      | -                             |                      |
| <b>STI symptoms in the last 12 months, n (%)</b>                      |                         |                             |                               |                      |
| Yes                                                                   | 352 (34.3%)             | 135 (31.3%)                 | 0.00 (-0.14 - 0.01)           | 0.726                |
| No                                                                    | 673 (65.5%)             | 294 (68.2%)                 |                               |                      |
| Missing                                                               | 2 (0.2%)                | 2 (0.5%)                    | -                             |                      |
| <b>Positive STI test in your life, n (%)</b>                          |                         |                             |                               |                      |
| Syphilis                                                              | 288 (28.0%)             | 99 (23.0%)                  | 0.00 (-0.03 - 0.12)           | 0.813                |
| Gonorrhoea                                                            | 444 (43.2%)             | 131 (30.4%)                 | 0.11 (0.00 - 0.32)            | 0.100                |
| Chlamydia                                                             | 420 (40.9%)             | 101 (23.4%)                 | 0.41 (0.20 - 0.62)            | 0.000                |
| Hepatitis C                                                           | 25 (2.4%)               | 18 (4.2%)                   | 0.00 (-0.21 - 0.00)           | 0.680                |
| Never                                                                 | 322 (31.4%)             | 177 (41.1%)                 | 0.00 (0.00 - 0.08)            | 0.883                |

<sup>a</sup>multivariable logistic regression coefficients and bootstrap-based 95% percentile confidence interval,

<sup>b</sup>single sided bootstrap-based P-values. CI confidence interval, PrEP pre-exposure prophylaxis, STI sexually transmitted infection

**Appendix S4:** Sensitivity analysis of multivariable logistic regression model including missing values as a separate category

|                                                                        | <b>PrEP<br/>users,<br/>n (%)</b> | <b>Non-PrEP<br/>users,<br/>n (%)</b> | <b><math>\beta</math> (95% CI)<sup>a</sup></b> | <b>P-value<sup>b</sup></b> |
|------------------------------------------------------------------------|----------------------------------|--------------------------------------|------------------------------------------------|----------------------------|
| <b>Total (n)</b>                                                       | 1027                             | 431                                  |                                                |                            |
| <b>Age (years)</b>                                                     |                                  |                                      |                                                |                            |
| Median (IQR)                                                           | 38 (31 - 45)                     | 35 (28 - 43.5)                       | -                                              |                            |
| 18-29, n (%)                                                           | 201 (19.6%)                      | 136 (31.6%)                          | -0.24 (-0.46 - -0.03)                          | 0.013                      |
| 30-39, n (%)                                                           | 358 (34.9%)                      | 132 (30.6%)                          | 0                                              |                            |
| 40-49, n (%)                                                           | 306 (29.8%)                      | 97 (22.5%)                           | 0.06 (0.00 - 0.26)                             | 0.320                      |
| 50-80, n (%)                                                           | 162 (15.8%)                      | 66 (15.3%)                           | -0.03 (-0.25 - 0.00)                           | 0.466                      |
| Missing, n (%)                                                         | 0 (0%)                           | 0 (0%)                               | 0.00 (0.00 - 0.00)                             | 1.000                      |
| <b>Country of origin, n (%)</b>                                        |                                  |                                      |                                                |                            |
| Germany                                                                | 847 (82.5%)                      | 337 (78.2%)                          | 0.00 (0.00 - 0.17)                             | 0.662                      |
| Outside Germany                                                        | 180 (17.5%)                      | 94 (21.8%)                           |                                                |                            |
| Missing                                                                | 0 (0%)                           | 0 (0%)                               | -                                              |                            |
| <b>Urban-rural area (based on plz), n (%)</b>                          |                                  |                                      |                                                |                            |
| Urban area                                                             | 900 (87.6%)                      | 352 (81.7%)                          | 0                                              |                            |
| Rural area                                                             | 105 (10.2%)                      | 61 (14.2%)                           | 0.00 (-0.25 - 0.00)                            | 0.550                      |
| Missing                                                                | 22 (2.1%)                        | 18 (4.2%)                            | 0.00 (-0.19 - 0.00)                            | 0.598                      |
| <b>Density of HIV-specialists in federal state of residence, n (%)</b> |                                  |                                      |                                                |                            |
| 0                                                                      | 12 (1.2%)                        | 4 (0.9%)                             | 0.00 (0.00 - 0.00)                             | 1.000                      |
| 1-2                                                                    | 81 (7.9%)                        | 42 (9.7%)                            | 0.00 (0.00 - 0.00)                             | 0.979                      |
| 3-5                                                                    | 255 (24.8%)                      | 105 (24.4%)                          | 0.00 (0.00 - 0.20)                             | 0.551                      |
| 6-9                                                                    | 369 (35.9%)                      | 181 (42.0%)                          | 0                                              |                            |
| 10-13                                                                  | 288 (28.0%)                      | 81 (18.8%)                           | 0.29 (0.09 - 0.51)                             | 0.003                      |
| Missing                                                                | 22 (2.1%)                        | 18 (4.2%)                            | 0.00 (-0.16 - 0.00)                            | 0.616                      |
| <b>Type of school qualification, n (%)</b>                             |                                  |                                      |                                                |                            |
| No school leaving qualification                                        | 7 (0.7%)                         | 9 (2.1%)                             | 0.00 (0.00 - 0.00)                             | 0.984                      |
| class 8/9                                                              | 49 (4.8%)                        | 20 (4.6%)                            | 0.00 (0.00 - 0.00)                             | 0.996                      |
| class 10                                                               | 190 (18.5%)                      | 104 (24.1%)                          | -0.10 (-0.31 - 0.00)                           | 0.187                      |
| A-Levels (class 12 or 13)                                              | 776 (75.6%)                      | 288 (66.8%)                          | 0                                              |                            |
| Missing                                                                | 5 (0.5%)                         | 10 (2.3%)                            | 0.00 (-0.01 - 0.00)                            | 0.970                      |
| <b>Monthly net equivalent income, n (%)</b>                            |                                  |                                      |                                                |                            |
| <1000€                                                                 | 79 (7.7%)                        | 74 (17.2%)                           | -0.27 (-0.50 - -0.01)                          | 0.022                      |
| 1000 - <2000€                                                          | 234 (22.8%)                      | 126 (29.2%)                          | -0.08 (-0.28 - 0.00)                           | 0.243                      |
| 2000 - <3000€                                                          | 294 (28.6%)                      | 120 (27.8%)                          | 0                                              |                            |
| 3000 - <4000€                                                          | 189 (18.4%)                      | 49 (11.4%)                           | 0.16 (0.00 - 0.39)                             | 0.098                      |
| 4000 - <5000€                                                          | 143 (13.9%)                      | 33 (7.7%)                            | 0.09 (0.00 - 0.33)                             | 0.238                      |
| ≥5000€                                                                 | 44 (4.3%)                        | 10 (2.3%)                            | 0.00 (0.00 - 0.09)                             | 0.896                      |
| Missing                                                                | 44 (4.3%)                        | 19 (4.4%)                            | 0.00 (-0.04 - 0.00)                            | 0.958                      |
| <b>Sex life, n (%)</b>                                                 |                                  |                                      |                                                |                            |
| Content                                                                | 717 (69.8%)                      | 206 (47.8%)                          | 0                                              |                            |
| Discontent                                                             | 148 (14.4%)                      | 108 (25.1%)                          | -0.31 (-0.52 - -0.07)                          | 0.006                      |
| Sex doesn't matter right now                                           | 12 (1.2%)                        | 14 (3.2%)                            | 0.00 (0.00 - 0.00)                             | 0.990                      |
| Missing                                                                | 150 (14.6%)                      | 103 (23.9%)                          | -0.26 (-0.48 - -0.02)                          | 0.014                      |
| <b>Number of sex partners within the last 6 months, n (%)</b>          |                                  |                                      |                                                |                            |
| 0                                                                      | 2 (0.2%)                         | 8 (1.9%)                             | 0.00 (0.00 - 0.00)                             | 0.995                      |
| 1                                                                      | 3 (0.3%)                         | 21 (4.9%)                            | -0.26 (-0.50 - 0.00)                           | 0.047                      |
| 2-3                                                                    | 123 (12.0%)                      | 134 (31.1%)                          | -0.76 (-0.98 - -0.54)                          | 0.000                      |
| 4-5                                                                    | 164 (16.0%)                      | 101 (23.4%)                          | -0.31 (-0.52 - -0.07)                          | 0.005                      |
| 6-10                                                                   | 242 (23.6%)                      | 83 (19.3%)                           | 0.00 (0.00 - 0.12)                             | 0.810                      |
| 11-20                                                                  | 193 (18.8%)                      | 35 (8.1%)                            | 0.26 (0.04 - 0.50)                             | 0.012                      |
| >20                                                                    | 286 (27.8%)                      | 47 (10.9%)                           | 0                                              |                            |
| Missing                                                                | 14 (1.4%)                        | 2 (0.5%)                             | 0.00 (0.00 - 0.00)                             | 1.000                      |
| <b>Condom use, n (%)</b>                                               |                                  |                                      |                                                |                            |
| 0%                                                                     | 322 (31.4%)                      | 62 (14.4%)                           | 0.49 (0.28 - 0.70)                             | 0.000                      |
| 25%                                                                    | 339 (33.0%)                      | 113 (26.2%)                          | 0                                              |                            |
| 50%                                                                    | 154 (15.0%)                      | 101 (23.4%)                          | -0.29 (-0.51 - -0.06)                          | 0.006                      |
| 75%                                                                    | 106 (10.3%)                      | 55 (12.8%)                           | 0.00 (-0.18 - 0.00)                            | 0.702                      |
| >95%                                                                   | 86 (8.4%)                        | 97 (22.5%)                           | -0.59 (-0.83 - -0.35)                          | 0.000                      |
| Missing                                                                | 20 (1.9%)                        | 3 (0.7%)                             | 0.00 (0.00 - 0.00)                             | 0.975                      |
| <b>Number of sexual intercours in the last month, n (%)</b>            |                                  |                                      |                                                |                            |
| 0                                                                      | 69 (6.7%)                        | 63 (14.6%)                           | -0.07 (-0.31 - 0.00)                           | 0.310                      |
| 1-4                                                                    | 442 (43.0%)                      | 217 (50.3%)                          | 0                                              |                            |
| 5-8                                                                    | 232 (22.6%)                      | 68 (15.8%)                           | 0.01 (0.00 - 0.23)                             | 0.472                      |



|                                                                       | <b>PrEP<br/>users,<br/>n (%)</b> | <b>Non-PrEP<br/>users,<br/>n (%)</b> | <b><math>\beta</math> (95% CI)<sup>a</sup></b> | <b>P-value<sup>b</sup></b> |
|-----------------------------------------------------------------------|----------------------------------|--------------------------------------|------------------------------------------------|----------------------------|
| 9-12                                                                  | 104 (10.1%)                      | 40 (9.3%)                            | 0.00 (-0.10 - 0.00)                            | 0.873                      |
| >12                                                                   | 168 (16.4%)                      | 38 (8.8%)                            | 0.12 (0.00 - 0.36)                             | 0.152                      |
| Missing                                                               | 12 (1.2%)                        | 5 (1.2%)                             | 0.00 (0.00 - 0.00)                             | 1.000                      |
| <b>Drugs during sex in the last 6 months, n (%)</b>                   |                                  |                                      |                                                |                            |
| Yes                                                                   | 201 (19.6%)                      | 130 (30.2%)                          | -0.32 (-0.51 - -0.10)                          | 0.002                      |
| No                                                                    | 808 (78.7%)                      | 289 (67.1%)                          | 0                                              |                            |
| Missing                                                               | 18 (1.8%)                        | 12 (2.8%)                            | 0.00 (-0.03 - 0.00)                            | 0.964                      |
| <b>Injecting Drugs during sex, n (%)</b>                              |                                  |                                      |                                                |                            |
| Yes, 0x in the last 6 months                                          | 2 (0.2%)                         | 5 (1.2%)                             | 0.00 (0.00 - 0.00)                             | 1.000                      |
| Yes, 1-3x in the last 6 months                                        | 10 (1.0%)                        | 4 (0.9%)                             | 0.00 (0.00 - 0.00)                             | 1.000                      |
| Yes, >3x in the last 6 months                                         | 17 (1.7%)                        | 6 (1.4%)                             | 0.00 (0.00 - 0.00)                             | 1.000                      |
| No                                                                    | 171 (16.7%)                      | 114 (26.5%)                          | -0.09 (-0.30 - 0.00)                           | 0.191                      |
| Missing                                                               | 827 (80.5%)                      | 302 (70.1%)                          | 0                                              |                            |
| <b>Payment for sex in the last 6 months, n (%)</b>                    |                                  |                                      |                                                |                            |
| Yes                                                                   | 58 (5.6%)                        | 37 (8.6%)                            | 0.00 (-0.19 - 0.00)                            | 0.667                      |
| No                                                                    | 964 (93.9%)                      | 381 (88.4%)                          | 0                                              |                            |
| Missing                                                               | 5 (0.5%)                         | 13 (3.0%)                            | 0.00 (-0.07 - 0.00)                            | 0.920                      |
| <b>Number of syphilis diagnosis in the last 12 months, n (%)</b>      |                                  |                                      |                                                |                            |
| 0                                                                     | 166 (16.2%)                      | 52 (12.1%)                           | 0.00 (0.00 - 0.12)                             | 0.849                      |
| 1                                                                     | 107 (10.4%)                      | 42 (9.7%)                            | 0.00 (-0.06 - 0.00)                            | 0.939                      |
| $\geq 2$                                                              | 11 (1.1%)                        | 2 (0.5%)                             | 0.00 (0.00 - 0.00)                             | 1.000                      |
| Missing                                                               | 743 (72.3%)                      | 335 (77.7%)                          | 0                                              |                            |
| <b>Number of gonorrhoea diagnosis in the last 12 months, n (%)</b>    |                                  |                                      |                                                |                            |
| 0                                                                     | 173 (16.8%)                      | 65 (15.1%)                           | 0.00 (-0.14 - 0.00)                            | 0.747                      |
| 1                                                                     | 200 (19.5%)                      | 56 (13.0%)                           | 0.03 (0.00 - 0.24)                             | 0.398                      |
| $\geq 2$                                                              | 68 (6.6%)                        | 10 (2.3%)                            | 0.00 (0.00 - 0.14)                             | 0.770                      |
| Missing                                                               | 586 (57.1%)                      | 300 (69.6%)                          | 0                                              |                            |
| <b>Number of chlamydia diagnosis in the last 12 months, n (%)</b>     |                                  |                                      |                                                |                            |
| 0                                                                     | 132 (12.9%)                      | 40 (9.3%)                            | 0.00 (0.00 - 0.00)                             | 0.975                      |
| 1                                                                     | 221 (21.5%)                      | 59 (13.7%)                           | 0.00 (0.00 - 0.08)                             | 0.896                      |
| $\geq 2$                                                              | 59 (5.7%)                        | 2 (0.5%)                             | 0.10 (0.00 - 0.28)                             | 0.174                      |
| Missing                                                               | 615 (59.9%)                      | 330 (76.6%)                          | 0                                              |                            |
| <b>Number of hepatitis C diagnosis in the last 12 months, n (%)</b>   |                                  |                                      |                                                |                            |
| 0                                                                     | 20 (1.9%)                        | 17 (3.9%)                            | 0.00 (-0.21 - 0.00)                            | 0.564                      |
| 1                                                                     | 5 (0.5%)                         | 1 (0.2%)                             | 0.00 (0.00 - 0.00)                             | 1.000                      |
| Missing                                                               | 1002 (97.6%)                     | 413 (95.8%)                          | 0                                              |                            |
| <b>Gender of sexual partners, n (%) (multiple responses possible)</b> |                                  |                                      |                                                |                            |
| Male                                                                  | 1027 (100.0%)                    | 430 (99.8%)                          | 0.00 (0.00 - 0.00)                             | 1.000                      |
| Female                                                                | 44 (4.3%)                        | 46 (10.7%)                           | -0.24 (-0.49 - 0.00)                           | 0.053                      |
| Non-binary                                                            | 33 (3.2%)                        | 13 (3.0%)                            | 0.00 (0.00 - 0.00)                             | 0.999                      |
| Missing                                                               | 0 (0%)                           | 0 (0%)                               | -                                              |                            |
| <b>STI symptoms in the last 12 months, n (%)</b>                      |                                  |                                      |                                                |                            |
| Yes                                                                   | 352 (34.3%)                      | 135 (31.3%)                          | 0.00 (-0.14 - 0.00)                            | 0.741                      |
| No                                                                    | 673 (65.5%)                      | 294 (68.2%)                          | 0                                              |                            |
| Missing                                                               | 2 (0.2%)                         | 2 (0.5%)                             | 0.00 (0.00 - 0.00)                             | 1.000                      |
| <b>Positive STI test in your life, n (%)</b>                          |                                  |                                      |                                                |                            |
| Syphilis                                                              | 288 (28.0%)                      | 99 (23.0%)                           | 0.00 (-0.02 - 0.10)                            | 0.835                      |
| Gonorrhoea                                                            | 444 (43.2%)                      | 131 (30.4%)                          | 0.10 (0.00 - 0.29)                             | 0.168                      |
| Chlamydia                                                             | 420 (40.9%)                      | 101 (23.4%)                          | 0.39 (0.19 - 0.60)                             | 0.000                      |
| Hepatitis C                                                           | 25 (2.4%)                        | 18 (4.2%)                            | 0.00 (-0.13 - 0.00)                            | 0.754                      |
| Never                                                                 | 322 (31.4%)                      | 177 (41.1%)                          | 0.00 (0.00 - 0.09)                             | 0.865                      |

<sup>a</sup> multivariable logistic regression coefficients and bootstrap-based 95% percentile confidence interval,

<sup>b</sup> single sided bootstrap-based P-values. CI confidence interval, PrEP pre-exposure prophylaxis, STI sexually transmitted infection
